# Supplementary material
Source: PubMed Central journal article supplement (PMC3031097)
Supplement: NIHMS264820-supplement-Table_S1.pdf [file NIHMS264820-supplement-Table_S1.pdf]

Table S1. All SNP association tests with sensation seeking (N=273 from 8 genes), sorted by p-value.

| SNP        | Gene   | Chr | Pos (bp)  | Function      | Allele | MAF   | b      | Z      | p     | FDR   |
|------------|--------|-----|-----------|---------------|--------|-------|--------|--------|-------|-------|
| rs11575551 | DDC    | 7   | 50493757  | mRNA-UTR      | C      | 0.025 | -3.266 | -2.756 | 0.006 | 0.006 |
| rs11575522 | DDC    | 7   | 50502889  | Intron        | A      | 0.046 | -2.185 | -2.581 | 0.010 | 0.013 |
| rs11575542 | DDC    | 7   | 50498481  | Nonsynonymous | A      | 0.046 | -2.125 | -2.512 | 0.012 | 0.019 |
| rs11575543 | DDC    | 7   | 50498363  | Intron        | T      | 0.045 | -2.170 | -2.506 | 0.012 | 0.025 |
| rs3829897  | DDC    | 7   | 50597258  | Intron        | T      | 0.416 | -0.896 | -2.456 | 0.014 | 0.031 |
| rs7876027  | DBH    | 9   | 135504360 | Intron        | G      | 0.073 | 1.688  | 2.335  | 0.020 | 0.038 |
| rs174699   | COMT   | 22  | 18334458  | Intron        | C      | 0.059 | -1.748 | -2.290 | 0.022 | 0.044 |
| rs10278338 | DDC    | 7   | 50597764  | Intron        | T      | 0.337 | -0.842 | -2.277 | 0.023 | 0.050 |
| rs11575552 | DDC    | 7   | 50493740  | mRNA-UTR      | C      | 0.015 | -3.118 | -2.250 | 0.024 | 0.056 |
| rs933271   | COMT   | 22  | 18311407  | Intron        | C      | 0.325 | -0.827 | -2.127 | 0.033 | 0.063 |
| rs12669770 | DDC    | 7   | 50597382  | Intron        | A      | 0.325 | -0.732 | -1.984 | 0.047 | 0.069 |
| rs2975284  | SLC6A3 | 5   | 1485552   | Intron        | T      | 0.014 | -2.902 | -1.970 | 0.049 | 0.075 |
| rs1108580  | DBH    | 9   | 135494935 | Synonymous    | A      | 0.447 | -0.688 | -1.945 | 0.052 | 0.081 |
| rs174675   | COMT   | 22  | 18314051  | Intron        | T      | 0.310 | -0.740 | -1.901 | 0.057 | 0.088 |
| rs7862391  | DBH    | 9   | 135506733 | Intron        | G      | 0.071 | 1.380  | 1.878  | 0.060 | 0.094 |
| rs7804365  | DDC    | 7   | 50586370  | Intron        | C      | 0.447 | 0.679  | 1.875  | 0.061 | 0.100 |
| rs13161905 | SLC6A3 | 5   | 1470212   | Intron        | T      | 0.331 | -0.714 | -1.833 | 0.067 | 0.106 |
| rs3025422  | DBH    | 9   | 135512247 | Intron        | C      | 0.027 | 1.944  | 1.799  | 0.072 | 0.113 |
| rs9312866  | SLC6A3 | 5   | 1489102   | Intron        | A      | 0.194 | 0.837  | 1.797  | 0.072 | 0.119 |
| rs11575537 | DDC    | 7   | 50499379  | Intron        | A      | 0.034 | -1.760 | -1.788 | 0.074 | 0.125 |
| rs11575549 | DDC    | 7   | 50497671  | Intron        | A      | 0.034 | -1.760 | -1.788 | 0.074 | 0.131 |
| rs1611131  | DBH    | 9   | 135512008 | Intron        | G      | 0.262 | -0.700 | -1.786 | 0.074 | 0.138 |
| rs6786095  | DRD3   | 3   | 115343133 | Intron        | T      | 0.019 | 2.423  | 1.747  | 0.081 | 0.144 |
| rs1611114  | DBH    | 9   | 135490024 | Locus         | T      | 0.250 | -0.711 | -1.726 | 0.084 | 0.150 |
| rs2042449  | SLC6A3 | 5   | 1469646   | Intron        | T      | 0.190 | 0.788  | 1.689  | 0.091 | 0.156 |
| rs6592961  | DDC    | 7   | 50540384  | Intron        | A      | 0.244 | -0.685 | -1.667 | 0.096 | 0.163 |
| rs11768267 | DDC    | 7   | 50501033  | Intron        | G      | 0.472 | -0.595 | -1.646 | 0.100 | 0.169 |
| rs1800827  | DRD3   | 3   | 115373875 | Intron        | A      | 0.062 | 1.266  | 1.641  | 0.101 | 0.175 |
| rs17529477 | DRD2   | 11  | 112822277 | Intron        | A      | 0.284 | 0.651  | 1.634  | 0.102 | 0.181 |
| rs6962356  | DDC    | 7   | 50589435  | Intron        | C      | 0.362 | -0.603 | -1.621 | 0.105 | 0.188 |
| rs6806217  | DRD3   | 3   | 115371759 | Intron        | G      | 0.062 | 1.244  | 1.613  | 0.107 | 0.194 |
| rs9306235  | COMT   | 22  | 18335157  | Intron        | A      | 0.062 | -1.202 | -1.612 | 0.107 | 0.200 |
| rs10934256 | DRD3   | 3   | 115368342 | Intron        | A      | 0.181 | -0.701 | -1.588 | 0.112 | 0.206 |
| rs10499694 | DDC    | 7   | 50581667  | Intron        | G      | 0.489 | 0.572  | 1.573  | 0.116 | 0.213 |
| rs10499691 | DDC    | 7   | 50496943  | Intron        | T      | 0.079 | -1.004 | -1.559 | 0.119 | 0.219 |
| rs11575451 | DDC    | 7   | 50515420  | Intron        | G      | 0.008 | 3.150  | 1.539  | 0.124 | 0.225 |

|            |        |    |           |               |   |       |        |        |       |       |
|------------|--------|----|-----------|---------------|---|-------|--------|--------|-------|-------|
| rs930707   | DDC    | 7  | 50587172  | Intron        | A | 0.042 | -1.354 | -1.527 | 0.127 | 0.231 |
| rs11575553 | DDC    | 7  | 50493713  | mRNA-UTR      | T | 0.080 | -0.968 | -1.511 | 0.131 | 0.238 |
| rs3807553  | DDC    | 7  | 50578107  | Intron        | A | 0.081 | -0.961 | -1.507 | 0.132 | 0.244 |
| rs2073835  | DBH    | 9  | 135514739 | Locus         | T | 0.293 | -0.567 | -1.506 | 0.132 | 0.250 |
| rs1108581  | DBH    | 9  | 135495062 | Intron        | G | 0.253 | 0.612  | 1.500  | 0.134 | 0.256 |
| rs12718572 | DDC    | 7  | 50540819  | Intron        | T | 0.346 | 0.575  | 1.495  | 0.135 | 0.263 |
| rs11575282 | DDC    | 7  | 50580201  | Intron        | T | 0.091 | -0.889 | -1.485 | 0.138 | 0.269 |
| rs11575286 | DDC    | 7  | 50579579  | Intron        | T | 0.091 | -0.889 | -1.483 | 0.138 | 0.275 |
| rs752306   | DRD4   | 11 | 627622    | Intron        | A | 0.048 | 1.201  | 1.452  | 0.146 | 0.281 |
| rs251937   | DRD1   | 5  | 174799526 | Locus         | C | 0.292 | 0.530  | 1.427  | 0.154 | 0.288 |
| rs464049   | SLC6A3 | 5  | 1476905   | Intron        | C | 0.494 | 0.500  | 1.411  | 0.158 | 0.294 |
| rs7809377  | DDC    | 7  | 50491702  | Locus         | A | 0.108 | -0.828 | -1.403 | 0.161 | 0.300 |
| rs737866   | COMT   | 22 | 18310109  | Intron        | G | 0.256 | 0.556  | 1.402  | 0.161 | 0.306 |
| rs921451   | DDC    | 7  | 50590779  | Intron        | C | 0.305 | -0.535 | -1.401 | 0.161 | 0.313 |
| rs11575550 | DDC    | 7  | 50497649  | Intron        | A | 0.007 | 3.002  | 1.398  | 0.162 | 0.319 |
| rs10993949 | DBH    | 9  | 135512806 | Intron        | G | 0.031 | 1.421  | 1.397  | 0.162 | 0.325 |
| rs737865   | COMT   | 22 | 18310121  | Intron        | C | 0.256 | 0.543  | 1.370  | 0.171 | 0.331 |
| rs6347     | SLC6A3 | 5  | 1464412   | Synonymous    | G | 0.294 | 0.532  | 1.361  | 0.173 | 0.338 |
| rs880028   | DDC    | 7  | 50537630  | Intron        | C | 0.200 | -0.580 | -1.344 | 0.179 | 0.344 |
| rs6264     | DDC    | 7  | 50579229  | Nonsynonymous | A | 0.002 | -5.924 | -1.333 | 0.183 | 0.350 |
| rs1039089  | DRD1   | 5  | 174798697 | Locus         | T | 0.148 | -0.641 | -1.303 | 0.193 | 0.356 |
| rs11575506 | DDC    | 7  | 50503989  | Intron        | C | 0.008 | 2.768  | 1.292  | 0.196 | 0.363 |
| rs3797200  | SLC6A3 | 5  | 1446344   | mRNA-UTR      | A | 0.218 | 0.538  | 1.289  | 0.197 | 0.369 |
| rs2873804  | DBH    | 9  | 135495465 | Intron        | T | 0.454 | -0.460 | -1.288 | 0.198 | 0.375 |
| rs226082   | DRD3   | 3  | 115363703 | Intron        | C | 0.352 | -0.488 | -1.285 | 0.199 | 0.381 |
| rs324029   | DRD3   | 3  | 115364313 | Intron        | A | 0.352 | -0.488 | -1.285 | 0.199 | 0.388 |
| rs3025425  | DBH    | 9  | 135512987 | Intron        | T | 0.028 | 1.390  | 1.274  | 0.203 | 0.394 |
| rs11706283 | DRD3   | 3  | 115367825 | Intron        | T | 0.081 | -0.794 | -1.252 | 0.211 | 0.400 |
| rs6351     | SLC6A3 | 5  | 1496151   | Synonymous    | T | 0.010 | 2.152  | 1.232  | 0.218 | 0.406 |
| rs16982842 | COMT   | 22 | 18325333  | Intron        | T | 0.006 | -2.771 | -1.229 | 0.219 | 0.413 |
| rs9332367  | COMT   | 22 | 18332626  | Intron        | A | 0.008 | -2.510 | -1.223 | 0.221 | 0.419 |
| rs11575302 | DDC    | 7  | 50575188  | Synonymous    | T | 0.036 | -1.155 | -1.215 | 0.224 | 0.425 |
| rs9332353  | COMT   | 22 | 18323267  | Intron        | I | 0.007 | -2.570 | -1.202 | 0.229 | 0.431 |
| rs9605031  | COMT   | 22 | 18313048  | Intron        | T | 0.250 | 0.481  | 1.200  | 0.230 | 0.438 |
| rs1611125  | DBH    | 9  | 135499133 | Intron        | G | 0.464 | -0.423 | -1.188 | 0.235 | 0.444 |
| rs2329340  | DDC    | 7  | 50587723  | Intron        | T | 0.310 | -0.449 | -1.180 | 0.238 | 0.450 |
| rs5320     | DBH    | 9  | 135497294 | Nonsynonymous | A | 0.074 | 0.806  | 1.173  | 0.241 | 0.456 |
| rs3779084  | DDC    | 7  | 50536229  | Intron        | C | 0.205 | -0.502 | -1.172 | 0.241 | 0.463 |

|            |        |    |           |               |   |       |        |        |       |       |
|------------|--------|----|-----------|---------------|---|-------|--------|--------|-------|-------|
| rs1982406  | DDC    | 7  | 50565121  | Intron        | A | 0.299 | -0.449 | -1.166 | 0.244 | 0.469 |
| rs9332333  | COMT   | 22 | 18315076  | Intron        | A | 0.032 | -1.259 | -1.162 | 0.245 | 0.475 |
| rs7638876  | DRD3   | 3  | 115376990 | Intron        | C | 0.428 | -0.443 | -1.157 | 0.247 | 0.481 |
| rs4947510  | DDC    | 7  | 50492914  | Locus         | A | 0.309 | -0.437 | -1.136 | 0.256 | 0.488 |
| rs1486009  | DRD3   | 3  | 115371222 | Intron        | G | 0.056 | -0.849 | -1.134 | 0.257 | 0.494 |
| rs4986918  | DRD2   | 11 | 112800452 | Synonymous    | T | 0.013 | -1.904 | -1.132 | 0.257 | 0.500 |
| rs2963252  | SLC6A3 | 5  | 1470047   | Intron        | A | 0.009 | -2.126 | -1.128 | 0.259 | 0.506 |
| rs28363166 | SLC6A3 | 5  | 1447814   | mRNA-UTR      | A | 0.025 | -1.351 | -1.126 | 0.260 | 0.513 |
| rs17634958 | DDC    | 7  | 50517374  | Intron        | A | 0.090 | -0.688 | -1.125 | 0.261 | 0.519 |
| rs13306304 | DBH    | 9  | 135513780 | mRNA-UTR      | A | 0.073 | 0.742  | 1.123  | 0.262 | 0.525 |
| rs2020917  | COMT   | 22 | 18313048  | Intron        | T | 0.250 | 0.448  | 1.120  | 0.263 | 0.531 |
| rs3773678  | DRD3   | 3  | 115352768 | Intron        | T | 0.230 | 0.533  | 1.100  | 0.271 | 0.538 |
| rs3025388  | DBH    | 9  | 135493077 | Intron        | G | 0.205 | 0.485  | 1.100  | 0.271 | 0.544 |
| rs963468   | DRD3   | 3  | 115345577 | Intron        | A | 0.355 | 0.414  | 1.095  | 0.274 | 0.550 |
| rs174697   | COMT   | 22 | 18333832  | Intron        | A | 0.089 | -0.673 | -1.078 | 0.281 | 0.556 |
| rs7812167  | DDC    | 7  | 50557978  | Intron        | A | 0.009 | -1.855 | -1.060 | 0.289 | 0.563 |
| rs4680     | COMT   | 22 | 18331271  | Nonsynonymous | A | 0.457 | 0.375  | 1.054  | 0.292 | 0.569 |
| rs324041   | DRD3   | 3  | 115347934 | Intron        | T | 0.029 | 1.178  | 1.038  | 0.299 | 0.575 |
| rs7791875  | DDC    | 7  | 50538382  | Intron        | T | 0.102 | -0.592 | -1.037 | 0.300 | 0.581 |
| rs8140265  | COMT   | 22 | 18313048  | Intron        | A | 0.251 | 0.414  | 1.037  | 0.300 | 0.588 |
| rs4947631  | DDC    | 7  | 50570873  | Intron        | C | 0.039 | -0.916 | -1.013 | 0.311 | 0.594 |
| rs6349     | SLC6A3 | 5  | 1456073   | Synonymous    | T | 0.022 | -1.227 | -1.009 | 0.313 | 0.600 |
| rs2654760  | DRD3   | 3  | 115355692 | Intron        | A | 0.015 | 1.553  | 1.006  | 0.314 | 0.606 |
| rs11575340 | DDC    | 7  | 50563965  | Intron        | A | 0.039 | -0.918 | -1.003 | 0.316 | 0.613 |
| rs2087017  | DRD3   | 3  | 115329973 | Locus         | G | 0.478 | 0.353  | 0.987  | 0.324 | 0.619 |
| rs1544325  | COMT   | 22 | 18311668  | Intron        | A | 0.391 | 0.354  | 0.977  | 0.329 | 0.625 |
| rs4490786  | DDC    | 7  | 50511808  | Intron        | T | 0.209 | -0.418 | -0.974 | 0.330 | 0.631 |
| rs27048    | SLC6A3 | 5  | 1465645   | Intron        | T | 0.430 | 0.358  | 0.968  | 0.333 | 0.638 |
| rs11575457 | DDC    | 7  | 50515078  | Intron        | T | 0.434 | -0.347 | -0.968 | 0.333 | 0.644 |
| rs7809758  | DDC    | 7  | 50540827  | Intron        | G | 0.351 | -0.349 | -0.961 | 0.336 | 0.650 |
| rs2630349  | DRD3   | 3  | 115356062 | Intron        | A | 0.120 | 0.547  | 0.953  | 0.340 | 0.656 |
| rs1042098  | SLC6A3 | 5  | 1447815   | mRNA-UTR      | C | 0.260 | 0.368  | 0.950  | 0.342 | 0.663 |
| rs11575548 | DDC    | 7  | 50497803  | Intron        | A | 0.091 | -0.577 | -0.945 | 0.345 | 0.669 |
| rs7616367  | DRD3   | 3  | 115364131 | Intron        | G | 0.371 | -0.351 | -0.935 | 0.350 | 0.675 |
| rs4975646  | SLC6A3 | 5  | 1486401   | Intron        | A | 0.303 | -0.360 | -0.917 | 0.359 | 0.681 |
| rs4992502  | DDC    | 7  | 50512685  | Intron        | C | 0.433 | -0.324 | -0.908 | 0.364 | 0.688 |
| rs28363169 | SLC6A3 | 5  | 1447234   | mRNA-UTR      | A | 0.021 | -1.156 | -0.895 | 0.371 | 0.694 |
| rs10499696 | DDC    | 7  | 50589082  | Intron        | G | 0.124 | 0.480  | 0.887  | 0.375 | 0.700 |

|            |        |    |           |               |   |       |        |        |       |       |
|------------|--------|----|-----------|---------------|---|-------|--------|--------|-------|-------|
| rs1349492  | DDC    | 7  | 50513953  | Intron        | G | 0.433 | -0.314 | -0.878 | 0.380 | 0.706 |
| rs9824856  | DRD3   | 3  | 115335421 | Intron        | C | 0.088 | 0.625  | 0.866  | 0.387 | 0.713 |
| rs6592952  | DDC    | 7  | 50527749  | Intron        | C | 0.442 | -0.310 | -0.865 | 0.387 | 0.719 |
| rs165774   | COMT   | 22 | 18332561  | Intron        | A | 0.289 | 0.342  | 0.863  | 0.388 | 0.725 |
| rs167770   | DRD3   | 3  | 115362252 | Intron        | G | 0.339 | -0.323 | -0.863 | 0.388 | 0.731 |
| rs4867798  | DRD1   | 5  | 174800505 | mRNA-UTR      | C | 0.317 | -0.329 | -0.862 | 0.389 | 0.738 |
| rs4648317  | DRD2   | 11 | 112836742 | Intron        | T | 0.154 | -0.407 | -0.855 | 0.393 | 0.744 |
| rs2963253  | SLC6A3 | 5  | 1467773   | Intron        | T | 0.016 | 1.276  | 0.851  | 0.395 | 0.750 |
| rs2455391  | SLC6A3 | 5  | 1496498   | Intron        | T | 0.232 | 0.364  | 0.839  | 0.401 | 0.756 |
| rs5324     | DBH    | 9  | 135498479 | Nonsynonymous | A | 0.009 | -1.651 | -0.831 | 0.406 | 0.763 |
| rs3837091  | DDC    | 7  | 50596234  | mRNA-UTR      | D | 0.226 | -0.350 | -0.830 | 0.406 | 0.769 |
| rs2007153  | DBH    | 9  | 135493640 | Intron        | A | 0.409 | 0.297  | 0.827  | 0.408 | 0.775 |
| rs3025382  | DBH    | 9  | 135492142 | Intron        | A | 0.149 | 0.409  | 0.810  | 0.418 | 0.781 |
| rs5326     | DRD1   | 5  | 174802802 | mRNA-UTR      | A | 0.147 | -0.397 | -0.794 | 0.427 | 0.788 |
| rs11575489 | DDC    | 7  | 50511385  | Intron        | A | 0.011 | -1.337 | -0.792 | 0.429 | 0.794 |
| rs2283124  | DBH    | 9  | 135505151 | Intron        | T | 0.125 | 0.409  | 0.779  | 0.436 | 0.800 |
| rs11564757 | SLC6A3 | 5  | 1496762   | Intron        | A | 0.079 | 0.496  | 0.771  | 0.441 | 0.806 |
| rs3735274  | DDC    | 7  | 50564124  | Intron        | C | 0.259 | -0.306 | -0.768 | 0.443 | 0.813 |
| rs9817063  | DRD3   | 3  | 115329798 | Locus         | C | 0.464 | 0.278  | 0.759  | 0.448 | 0.819 |
| rs129882   | DBH    | 9  | 135513490 | mRNA-UTR      | T | 0.186 | -0.340 | -0.757 | 0.449 | 0.825 |
| rs6350     | SLC6A3 | 5  | 1496199   | Synonymous    | T | 0.078 | 0.491  | 0.753  | 0.451 | 0.831 |
| rs2242592  | DRD2   | 11 | 112784640 | Locus         | C | 0.375 | -0.284 | -0.747 | 0.455 | 0.838 |
| rs7611535  | DRD3   | 3  | 115364131 | Intron        | T | 0.258 | -0.301 | -0.746 | 0.456 | 0.844 |
| rs6589381  | DRD2   | 11 | 112823217 | Intron        | A | 0.442 | 0.267  | 0.729  | 0.466 | 0.850 |
| rs732833   | DBH    | 9  | 135510483 | Intron        | G | 0.423 | -0.246 | -0.723 | 0.470 | 0.856 |
| rs2587550  | DRD2   | 11 | 112786607 | mRNA-UTR      | C | 0.392 | -0.274 | -0.714 | 0.475 | 0.863 |
| rs7807335  | DDC    | 7  | 50599356  | Intron        | A | 0.220 | -0.303 | -0.709 | 0.478 | 0.869 |
| rs4938019  | DRD2   | 11 | 112846601 | Intron        | C | 0.151 | -0.333 | -0.699 | 0.484 | 0.875 |
| rs4436578  | DRD2   | 11 | 112811975 | Intron        | C | 0.210 | -0.324 | -0.695 | 0.487 | 0.881 |
| rs877137   | DRD2   | 11 | 112788669 | Synonymous    | T | 0.461 | 0.243  | 0.651  | 0.515 | 0.888 |
| rs324026   | DRD3   | 3  | 115373732 | Intron        | C | 0.401 | -0.244 | -0.648 | 0.517 | 0.894 |
| rs2471005  | DRD1   | 5  | 174798904 | Locus         | T | 0.328 | -0.241 | -0.646 | 0.518 | 0.900 |
| rs10499695 | DDC    | 7  | 50586098  | Intron        | T | 0.490 | -0.230 | -0.645 | 0.519 | 0.906 |
| rs6271     | DBH    | 9  | 135512095 | Nonsynonymous | T | 0.064 | 0.469  | 0.643  | 0.520 | 0.913 |
| rs3776512  | SLC6A3 | 5  | 1460116   | Intron        | T | 0.150 | 0.314  | 0.642  | 0.521 | 0.919 |
| rs16822416 | DRD3   | 3  | 115373000 | Intron        | A | 0.068 | -0.447 | -0.635 | 0.525 | 0.925 |
| rs3732783  | DRD3   | 3  | 115373479 | Synonymous    | G | 0.068 | -0.447 | -0.635 | 0.525 | 0.931 |
| rs2251177  | DRD3   | 3  | 115341040 | Synonymous    | C | 0.023 | 0.755  | 0.626  | 0.531 | 0.938 |

|            |        |    |           |               |   |       |        |        |       |       |
|------------|--------|----|-----------|---------------|---|-------|--------|--------|-------|-------|
| rs3758653  | DRD4   | 11 | 626399    | Locus         | C | 0.168 | 0.279  | 0.617  | 0.538 | 0.944 |
| rs4479021  | DRD2   | 11 | 112823217 | Intron        | A | 0.433 | 0.220  | 0.612  | 0.541 | 0.950 |
| rs2797853  | DBH    | 9  | 135502336 | Intron        | A | 0.291 | -0.237 | -0.610 | 0.542 | 0.956 |
| rs1611120  | DBH    | 9  | 135497122 | Intron        | A | 0.052 | 0.486  | 0.607  | 0.544 | 0.963 |
| rs2617605  | SLC6A3 | 5  | 1495521   | Intron        | G | 0.351 | 0.221  | 0.602  | 0.547 | 0.969 |
| rs4633     | COMT   | 22 | 18330235  | Synonymous    | T | 0.467 | 0.208  | 0.594  | 0.552 | 0.975 |
| rs6275     | DRD2   | 11 | 112788687 | Synonymous    | T | 0.362 | -0.222 | -0.590 | 0.555 | 0.981 |
| rs9332362  | COMT   | 22 | 18329103  | Intron        | A | 0.032 | 0.594  | 0.588  | 0.557 | 0.988 |
| rs6869645  | SLC6A3 | 5  | 1457548   | Intron        | T | 0.086 | -0.365 | -0.587 | 0.557 | 0.994 |
| rs5322     | DBH    | 9  | 135497398 | Synonymous    | T | 0.028 | -0.636 | -0.585 | 0.559 | 1.000 |
| rs1611123  | DBH    | 9  | 135498904 | Intron        | A | 0.458 | 0.203  | 0.581  | 0.561 | 1.006 |
| rs2097628  | DBH    | 9  | 135509523 | Intron        | C | 0.389 | -0.202 | -0.575 | 0.565 | 1.013 |
| rs9332316  | COMT   | 22 | 18310274  | Intron        | T | 0.016 | 0.810  | 0.570  | 0.569 | 1.019 |
| rs9332317  | COMT   | 22 | 18310398  | Intron        | C | 0.002 | -2.064 | -0.569 | 0.569 | 1.025 |
| rs4648318  | DRD2   | 11 | 112818599 | Intron        | G | 0.290 | -0.216 | -0.564 | 0.573 | 1.031 |
| rs1394016  | DRD3   | 3  | 115377084 | Intron        | A | 0.478 | -0.212 | -0.555 | 0.579 | 1.038 |
| rs769224   | COMT   | 22 | 18331804  | Synonymous    | A | 0.032 | 0.557  | 0.547  | 0.584 | 1.044 |
| rs174696   | COMT   | 22 | 18333176  | Intron        | C | 0.292 | -0.222 | -0.544 | 0.587 | 1.050 |
| rs754672   | DRD2   | 11 | 112788669 | Synonymous    | T | 0.470 | 0.201  | 0.535  | 0.593 | 1.056 |
| rs265981   | DRD1   | 5  | 174803508 | mRNA-UTR      | A | 0.310 | -0.203 | -0.530 | 0.596 | 1.063 |
| rs10891549 | DRD2   | 11 | 112783657 | Locus         | C | 0.475 | 0.198  | 0.530  | 0.596 | 1.069 |
| rs12364051 | DRD2   | 11 | 112810524 | Intron        | A | 0.461 | -0.194 | -0.529 | 0.597 | 1.075 |
| rs11575387 | DDC    | 7  | 50534929  | Intron        | C | 0.108 | -0.296 | -0.522 | 0.602 | 1.081 |
| rs1079597  | DRD2   | 11 | 112801496 | Intron        | A | 0.150 | -0.259 | -0.521 | 0.603 | 1.088 |
| rs9288993  | DRD3   | 3  | 115341863 | Intron        | G | 0.065 | 0.387  | 0.513  | 0.608 | 1.094 |
| rs6280     | DRD3   | 3  | 115373505 | Nonsynonymous | C | 0.400 | -0.192 | -0.508 | 0.611 | 1.100 |
| rs3807556  | DDC    | 7  | 50578030  | Intron        | T | 0.202 | -0.225 | -0.507 | 0.612 | 1.106 |
| rs11238133 | DDC    | 7  | 50510408  | Intron        | A | 0.316 | -0.186 | -0.490 | 0.624 | 1.113 |
| rs6950777  | DDC    | 7  | 50564550  | Intron        | A | 0.260 | -0.194 | -0.477 | 0.634 | 1.119 |
| rs9332351  | COMT   | 22 | 18323254  | Intron        | G | 0.028 | 0.486  | 0.455  | 0.649 | 1.125 |
| rs4532     | DRD1   | 5  | 174802756 | mRNA-UTR      | C | 0.316 | -0.167 | -0.443 | 0.658 | 1.131 |
| rs2519143  | DBH    | 9  | 135492149 | Intron        | T | 0.204 | 0.190  | 0.437  | 0.662 | 1.138 |
| rs3735273  | DDC    | 7  | 50564358  | Intron        | A | 0.252 | -0.175 | -0.425 | 0.671 | 1.144 |
| rs11246226 | DRD4   | 11 | 631191    | Locus         | A | 0.486 | -0.148 | -0.415 | 0.678 | 1.150 |
| rs11575544 | DDC    | 7  | 50498256  | Intron        | T | 0.063 | -0.297 | -0.405 | 0.685 | 1.156 |
| rs2519155  | DBH    | 9  | 135494419 | Intron        | G | 0.313 | 0.147  | 0.401  | 0.688 | 1.163 |
| rs1376523  | DDC    | 7  | 50536835  | Intron        | A | 0.047 | -0.321 | -0.401 | 0.688 | 1.169 |
| rs732215   | DDC    | 7  | 50511557  | Intron        | G | 0.434 | 0.139  | 0.395  | 0.693 | 1.175 |

|            |        |    |           |               |   |       |        |        |       |       |
|------------|--------|----|-----------|---------------|---|-------|--------|--------|-------|-------|
| rs2471857  | DRD2   | 11 | 112803549 | Intron        | A | 0.149 | -0.195 | -0.386 | 0.700 | 1.181 |
| rs1125393  | DRD2   | 11 | 112802559 | Intron        | A | 0.136 | -0.197 | -0.377 | 0.706 | 1.188 |
| rs11133767 | SLC6A3 | 5  | 1454580   | Intron        | A | 0.326 | 0.139  | 0.376  | 0.707 | 1.194 |
| rs28363167 | SLC6A3 | 5  | 1447615   | mRNA-UTR      | A | 0.006 | -0.897 | -0.373 | 0.709 | 1.200 |
| rs2440390  | DRD2   | 11 | 112792088 | Intron        | T | 0.119 | -0.198 | -0.373 | 0.709 | 1.206 |
| rs1079727  | DRD2   | 11 | 112794392 | Intron        | G | 0.136 | -0.194 | -0.370 | 0.711 | 1.213 |
| rs3776511  | SLC6A3 | 5  | 1460129   | Intron        | A | 0.149 | 0.174  | 0.355  | 0.723 | 1.219 |
| rs4936270  | DRD2   | 11 | 112823618 | Intron        | T | 0.177 | -0.188 | -0.351 | 0.725 | 1.225 |
| rs1611115  | DBH    | 9  | 135490336 | Locus         | T | 0.227 | 0.147  | 0.336  | 0.737 | 1.231 |
| rs11575281 | DDC    | 7  | 50580268  | Intron        | G | 0.023 | -0.392 | -0.327 | 0.743 | 1.238 |
| rs165656   | COMT   | 22 | 18328863  | Intron        | C | 0.486 | 0.111  | 0.321  | 0.748 | 1.244 |
| rs2630351  | DRD3   | 3  | 115357749 | Intron        | A | 0.078 | -0.209 | -0.317 | 0.751 | 1.250 |
| rs10064525 | SLC6A3 | 5  | 1445721   | Locus         | G | 0.093 | 0.169  | 0.288  | 0.773 | 1.256 |
| rs11575516 | DDC    | 7  | 50503364  | Intron        | A | 0.017 | -0.400 | -0.288 | 0.773 | 1.263 |
| rs17133877 | DDC    | 7  | 50576192  | Intron        | A | 0.091 | -0.182 | -0.288 | 0.773 | 1.269 |
| rs10235371 | DDC    | 7  | 50491702  | Locus         | T | 0.082 | -0.183 | -0.278 | 0.781 | 1.275 |
| rs11575298 | DDC    | 7  | 50578259  | Intron        | C | 0.115 | 0.155  | 0.276  | 0.783 | 1.281 |
| rs1799978  | DRD2   | 11 | 112851561 | Locus         | G | 0.072 | 0.199  | 0.275  | 0.783 | 1.288 |
| rs9332348  | COMT   | 22 | 18322985  | Intron        | T | 0.006 | 0.667  | 0.274  | 0.784 | 1.294 |
| rs1076560  | DRD2   | 11 | 112788898 | Intron        | A | 0.138 | -0.143 | -0.274 | 0.784 | 1.300 |
| rs9828046  | DRD3   | 3  | 115340953 | Intron        | A | 0.041 | 0.232  | 0.268  | 0.788 | 1.306 |
| rs11214606 | DRD2   | 11 | 112815079 | Intron        | T | 0.039 | -0.232 | -0.262 | 0.794 | 1.313 |
| rs3807552  | DDC    | 7  | 50578236  | Intron        | T | 0.265 | -0.106 | -0.261 | 0.794 | 1.319 |
| rs6262     | DDC    | 7  | 50563414  | Nonsynonymous | T | 0.009 | 0.509  | 0.259  | 0.795 | 1.325 |
| rs4648319  | DRD2   | 11 | 112819573 | Intron        | T | 0.136 | -0.134 | -0.258 | 0.796 | 1.331 |
| rs9825563  | DRD3   | 3  | 115374239 | Intron        | G | 0.357 | -0.092 | -0.250 | 0.802 | 1.338 |
| rs4620755  | DRD2   | 11 | 112814829 | Intron        | A | 0.149 | -0.124 | -0.249 | 0.804 | 1.344 |
| rs11238131 | DDC    | 7  | 50506083  | Intron        | T | 0.329 | -0.094 | -0.246 | 0.805 | 1.350 |
| rs265978   | DRD1   | 5  | 174798904 | Locus         | C | 0.356 | 0.084  | 0.238  | 0.812 | 1.356 |
| rs4938021  | DRD2   | 11 | 112839419 | Intron        | C | 0.339 | 0.088  | 0.234  | 0.815 | 1.363 |
| rs6593011  | DDC    | 7  | 50600290  | Intron        | A | 0.198 | 0.104  | 0.227  | 0.820 | 1.369 |
| rs6589377  | DRD2   | 11 | 112839419 | Intron        | G | 0.339 | 0.084  | 0.224  | 0.823 | 1.375 |
| rs9332377  | COMT   | 22 | 18335692  | Intron        | T | 0.184 | -0.102 | -0.220 | 0.825 | 1.381 |
| rs1076563  | DRD2   | 11 | 112801119 | Intron        | A | 0.468 | -0.082 | -0.219 | 0.827 | 1.388 |
| rs3807558  | DDC    | 7  | 50538516  | Intron        | T | 0.223 | -0.093 | -0.219 | 0.827 | 1.394 |
| rs10235796 | DDC    | 7  | 50496878  | Intron        | T | 0.175 | -0.100 | -0.214 | 0.831 | 1.400 |
| rs77905    | DBH    | 9  | 135507918 | Synonymous    | T | 0.473 | -0.073 | -0.209 | 0.834 | 1.406 |
| rs1076562  | DRD2   | 11 | 112801218 | Intron        | A | 0.305 | 0.080  | 0.208  | 0.835 | 1.413 |

|            |        |    |           |               |   |       |        |        |       |       |
|------------|--------|----|-----------|---------------|---|-------|--------|--------|-------|-------|
| rs4245146  | DRD2   | 11 | 112823183 | Intron        | C | 0.489 | 0.072  | 0.201  | 0.841 | 1.419 |
| rs2734838  | DRD2   | 11 | 112791711 | Intron        | T | 0.469 | -0.074 | -0.201 | 0.841 | 1.425 |
| rs6263     | DDC    | 7  | 50563394  | Nonsynonymous | G | 0.017 | 0.276  | 0.199  | 0.842 | 1.431 |
| rs10993947 | DBH    | 9  | 135499943 | Intron        | T | 0.091 | 0.113  | 0.186  | 0.852 | 1.438 |
| rs167771   | DRD3   | 3  | 115358965 | Intron        | G | 0.287 | -0.087 | -0.185 | 0.853 | 1.444 |
| rs27072    | SLC6A3 | 5  | 1447522   | mRNA-UTR      | T | 0.169 | 0.088  | 0.180  | 0.857 | 1.450 |
| rs740601   | COMT   | 22 | 18330763  | Intron        | C | 0.409 | -0.063 | -0.179 | 0.858 | 1.456 |
| rs5993883  | COMT   | 22 | 18317638  | Intron        | T | 0.465 | 0.062  | 0.177  | 0.859 | 1.463 |
| rs745043   | DDC    | 7  | 50511449  | Intron        | A | 0.224 | 0.075  | 0.176  | 0.860 | 1.469 |
| rs686      | DRD1   | 5  | 174801306 | mRNA-UTR      | G | 0.401 | -0.062 | -0.174 | 0.862 | 1.475 |
| rs1611118  | DBH    | 9  | 135494744 | Intron        | T | 0.053 | 0.131  | 0.172  | 0.863 | 1.481 |
| rs2283123  | DBH    | 9  | 135505118 | Intron        | T | 0.105 | 0.097  | 0.172  | 0.863 | 1.488 |
| rs6348     | SLC6A3 | 5  | 1473801   | Synonymous    | T | 0.048 | -0.152 | -0.169 | 0.866 | 1.494 |
| rs11564771 | SLC6A3 | 5  | 1451797   | Intron        | T | 0.099 | -0.097 | -0.167 | 0.867 | 1.500 |
| rs6274     | DRD2   | 11 | 112786138 | mRNA-UTR      | G | 0.030 | -0.193 | -0.166 | 0.868 | 1.506 |
| rs1116313  | DRD2   | 11 | 112801317 | Intron        | T | 0.468 | -0.061 | -0.163 | 0.870 | 1.513 |
| rs403636   | SLC6A3 | 5  | 1491354   | Intron        | T | 0.164 | -0.074 | -0.158 | 0.874 | 1.519 |
| rs3735275  | DDC    | 7  | 50496878  | Intron        | C | 0.183 | 0.068  | 0.146  | 0.884 | 1.525 |
| rs2519154  | DBH    | 9  | 135502096 | Intron        | G | 0.409 | -0.052 | -0.140 | 0.889 | 1.531 |
| rs7131056  | DRD2   | 11 | 112834984 | Intron        | A | 0.468 | 0.049  | 0.137  | 0.891 | 1.538 |
| rs8192488  | COMT   | 22 | 18331237  | Synonymous    | T | 0.011 | 0.234  | 0.134  | 0.893 | 1.544 |
| rs1800443  | DRD4   | 11 | 629830    | Nonsynonymous | G | 0.010 | 0.242  | 0.132  | 0.895 | 1.550 |
| rs4646312  | COMT   | 22 | 18328337  | Intron        | C | 0.357 | -0.045 | -0.123 | 0.902 | 1.556 |
| rs9332380  | COMT   | 22 | 18336417  | mRNA-UTR      | A | 0.007 | 0.245  | 0.114  | 0.909 | 1.563 |
| rs6880875  | SLC6A3 | 5  | 1459375   | Synonymous    | T | 0.020 | 0.149  | 0.114  | 0.909 | 1.569 |
| rs11575292 | DDC    | 7  | 50579095  | Nonsynonymous | T | 0.004 | 0.257  | 0.107  | 0.915 | 1.575 |
| rs10268819 | DDC    | 7  | 50577565  | Intron        | T | 0.116 | 0.059  | 0.107  | 0.915 | 1.581 |
| rs2134655  | DRD3   | 3  | 115340891 | Intron        | A | 0.216 | 0.047  | 0.107  | 0.915 | 1.588 |
| rs2329371  | DDC    | 7  | 50582934  | Intron        | A | 0.216 | -0.046 | -0.105 | 0.916 | 1.594 |
| rs7125415  | DRD2   | 11 | 112815891 | Intron        | T | 0.110 | -0.052 | -0.091 | 0.927 | 1.600 |
| rs2239393  | COMT   | 22 | 18330428  | Intron        | G | 0.408 | -0.031 | -0.088 | 0.930 | 1.606 |
| rs4274224  | DRD2   | 11 | 112824662 | Intron        | A | 0.490 | 0.024  | 0.065  | 0.948 | 1.613 |
| rs11575437 | DDC    | 7  | 50520977  | Intron        | T | 0.009 | 0.128  | 0.065  | 0.948 | 1.619 |
| rs739368   | COMT   | 22 | 18319096  | Intron        | T | 0.029 | 0.070  | 0.063  | 0.950 | 1.625 |
| rs2002453  | DRD2   | 11 | 112794508 | Intron        | T | 0.305 | 0.022  | 0.056  | 0.955 | 1.631 |
| rs12538151 | DDC    | 7  | 50496878  | Intron        | A | 0.186 | 0.022  | 0.046  | 0.963 | 1.638 |
| rs3779078  | DDC    | 7  | 50578412  | Intron        | A | 0.216 | -0.020 | -0.046 | 0.963 | 1.644 |
| rs28363168 | SLC6A3 | 5  | 1447389   | mRNA-UTR      | T | 0.015 | -0.062 | -0.042 | 0.966 | 1.650 |

|            |        |    |           |               |   |       |        |        |       |       |
|------------|--------|----|-----------|---------------|---|-------|--------|--------|-------|-------|
| rs7118161  | DRD2   | 11 | 112808800 | Intron        | A | 0.013 | 0.054  | 0.036  | 0.971 | 1.656 |
| rs40184    | SLC6A3 | 5  | 1448077   | Intron        | A | 0.438 | -0.012 | -0.035 | 0.972 | 1.663 |
| rs4531     | DBH    | 9  | 135499191 | Nonsynonymous | T | 0.090 | 0.019  | 0.031  | 0.976 | 1.669 |
| rs1541332  | DBH    | 9  | 135501337 | Intron        | T | 0.468 | -0.009 | -0.024 | 0.981 | 1.675 |
| rs4581480  | DRD2   | 11 | 112829684 | Intron        | C | 0.172 | -0.011 | -0.020 | 0.984 | 1.681 |
| rs11575378 | DDC    | 7  | 50539059  | Intron        | T | 0.009 | 0.029  | 0.015  | 0.988 | 1.688 |
| rs4646316  | COMT   | 22 | 18332132  | Intron        | T | 0.233 | 0.006  | 0.014  | 0.989 | 1.694 |
| rs460000   | SLC6A3 | 5  | 1485825   | Intron        | A | 0.282 | 0.005  | 0.011  | 0.991 | 1.700 |
| rs2735917  | SLC6A3 | 5  | 1473268   | Intron        | T | 0.049 | 0.001  | 0.001  | 0.999 | 1.706 |

---
